# Supplementary material for: Community-based interventions to prevent stroke in low-income and middle-income countries: a protocol for a systematic review and meta-analysis
Source: HighWire-hosted journal article supplement (doi:10.1136/bmjopen-2022-063181), 2022-08-01
Supplement: bmjopen-2022-063181supp003_data_supplement.pdf [file bmjopen-2022-063181supp003_data_supplement.pdf]

### **Search Strategy for Web of Science and Scopus:**

#### **Web of Science:**

1. "emerging country" OR "developing country" OR "least developed countries" OR "less developed country" OR "lesser developed country" OR "under developed country" OR "middle income country" OR "low income country" OR "lower income country" OR "underserved country" OR "deprived country" OR "poor country" OR LMICs OR "Low and middle income countries" OR "Low income and middle income countries" OR Africa OR Asia OR Caribbean OR "West Indies" OR "South America" OR "Latin America" OR "Central America" OR "Atlantic Islands" OR "Commonwealth of Independent States" OR "Pacific Islands" OR "Indian Ocean Islands" OR "Eastern Europe"
2. "communit\*" OR "outreach" OR "outreaches" OR "outreaching" OR "engage\*" OR "empower\*" OR "awareness" OR "awareness" OR "aware" OR "awarenesses" OR "aware\*" OR "mobilis\*" OR "mobiliz\*" OR "community-based intervention" OR "public education" OR "community education" OR "health education" OR "knowledge increase"
3. "stroke" OR "stroke" OR "strokes" OR "stroke s" OR "ischemic stroke" OR "cerebral stroke" OR "cerebrovascular stroke" OR "cerebral hemorrhage" OR "cerebral Infarction" OR "intracerebral hemorrhage" OR "Intracranial Hemorrhages" OR "Brain Ischemia"
4. 1 AND 2 AND 3

# Filter: Topic

#### **SCOPUS**

1. "emerging country" OR "developing country" OR "least developed countries" OR "less developed country" OR "lesser developed country" OR "under developed country" OR "middle income country" OR "low income country" OR "lower income country" OR "underserved country" OR "deprived country" OR "poor country" OR LMICs OR "Low and middle income countries" OR "Low income and middle income countries" OR Africa OR Asia OR Caribbean OR "West Indies" OR "South America" OR "Latin America" OR "Central America" OR "Atlantic Islands" OR "Commonwealth of Independent States" OR "Pacific Islands" OR "Indian Ocean Islands" OR "Eastern Europe"
2. "communit\*" OR "outreach" OR "outreaches" OR "outreaching" OR "engage\*" OR "empower\*" OR "awareness" OR "awareness" OR "aware" OR "awarenesses" OR "aware\*" OR "mobilis\*" OR "mobiliz\*" OR "community-based intervention" OR "public education" OR "community education" OR "health education" OR "knowledge increase"
3. "stroke" OR "stroke" OR "strokes" OR "stroke s" OR "ischemic stroke" OR "cerebral stroke" OR "cerebrovascular stroke" OR "cerebral hemorrhage" OR "cerebral Infarction" OR "intracerebral hemorrhage" OR "Intracranial Hemorrhages" OR "Brain Ischemia"
4. 1 AND 2 AND 3

# Filter: Title, Abstract, Keyword
